# The Dorsocross T-box transcription factors promote tissue morphogenesis in the *Drosophila* wing imaginal disc

Liyuan Sui<sup>1</sup>, Gert O. Pflugfelder<sup>2,\*</sup> and Jie Shen<sup>1,2,\*</sup>

## SUMMARY

The *Drosophila* wing imaginal disc is subdivided into notum, hinge and blade territories during the third larval instar by formation of several deep apical folds. The molecular mechanisms of these subdivisions and the subsequent initiation of morphogenic processes during metamorphosis are poorly understood. Here, we demonstrate that the Dorsocross (Doc) T-box genes promote the progression of epithelial folds that not only separate the hinge and blade regions of the wing disc but also contribute to metamorphic development by changing cell shapes and bending the wing disc. We found that Doc expression was restricted by two inhibitors, Vestigial and Homothorax, leading to two narrow Doc stripes where the folds separating hinge and blade are forming. Doc mutant clones prevented the lateral extension and deepening of these folds at the larval stage and delayed wing disc bending in the early pupal stage. Ectopic Doc expression was sufficient to generate deep apical folds by causing a basolateral redistribution of the apical microtubule web and a shortening of cells. Cells of both the endogenous blade/hinge folds and of folds elicited by ectopic Doc expression expressed Matrix metalloproteinase 2 (Mmp2). In these folds, integrins and extracellular matrix proteins were depleted. Overexpression of Doc along the blade/hinge folds caused precocious wing disc bending, which could be suppressed by co-expressing *MMP2RNAi*.

**KEY WORDS:** *Drosophila* wing, Dorsocross, Fold formation, Metamorphosis, Extracellular matrix

## INTRODUCTION

In *Drosophila*, eight T-box genes have been identified (Pflugfelder et al., 1992; Murakami et al., 1995; Brook and Cohen, 1996; Singer et al., 1996; Porsch et al., 1998; Reim et al., 2003; Hamaguchi et al., 2004; Ingham and Placzek, 2006). Dorsocross (Doc), the *Drosophila* Tbx6 subfamily gene cluster, encodes three closely related proteins: Doc1, Doc2 and Doc3, which are essential for proper development of amnioserosa, heart and hindgut (Lo and Frasch, 2001; Reim et al., 2003; Hamaguchi et al., 2004; Reim and Frasch, 2005). The three genes are arranged in a cluster and are expressed in identical patterns in the embryo. They appear to be functionally redundant. In the embryonic dorsal ectoderm, Doc is expressed in the amnioserosa, a specialized epithelium that is required for proper morphogenesis of the embryo during germ band retraction (Reim et al., 2003; Hamaguchi et al., 2004). In the embryonic Malpighian tubules, Doc is required for the execution of an epithelial restructuring process (Hatton-Ellis et al., 2007). Many vertebrate Tbx genes are involved in limb development (King et al., 2006). Doc genes are required for the specification of wing and haltere disc primordia (Hamaguchi et al., 2004). Ectopic *Doc2* expression in the Dpp domain inhibits *wingless* (*wg*) and results in the loss of distal structures of wing, leg and antenna of adult animals (Reim et al., 2003).

The *Drosophila* wing imaginal disc is subdivided along the proximal-distal axis into the notum, hinge and blade territories (Bryant, 1970; Cohen, 1993; Casares and Mann, 2000; Grieder et al., 2009). Compared with the well-studied wing blade, development of the hinge has not been intensively investigated. The hinge region can be further subdivided into three regions: proximal, intermediate and distal (Klein, 2001). Previous studies have suggested that subdivision of the dorsal hinge is achieved through interactions between adjacent cell populations. The Iroquois complex (Iro-C) homeodomain proteins are expressed in the prospective notum and are required to specify body wall identity. Cells lacking these proteins convert to the hinge fate (Diez del Corral et al., 1999). Importantly, mutual repression between Iro-C and *muscle segment homeobox* (*msh*; *Drop* – FlyBase) has been found to be essential for establishing the boundary between body wall and wing (Villa-Cuesta and Modolell, 2005).

Wg signaling is crucial for intermediate and distal hinge specification, and for the subdivision between pouch and hinge. In the absence of Wg function, neither wing blade nor hinge is specified, leading to a duplication of the notum (Sharma and Chopra, 1976; Morata and Lawrence, 1977). Ectopic activation of the Wg pathway in the wing hinge leads to overgrowth, indicating a mitogenic role for Wg in this region (Neumann and Cohen, 1996). Wg signaling induces different responses in wing hinge and pouch. In response to Decapentaplegic (Dpp), Notch (N) and Wg signaling, Vestigial (Vg) functions as a selector protein, determining wing blade and repressing hinge fate (Klein et al., 1998; Klein and Arias, 1999; Liu et al., 2000). Subsequently, a mutually antagonistic loop between *vg*, *homothorax* (*hth*) and *teashirt* (*tsh*) is crucial for the subdivision into wing blade and hinge. As a hinge Wg target gene, *hth* collaborates with its co-effector *tsh* to specify hinge fate and to repress wing blade fate by repressing *vg* (Azpiazu and Morata, 2000; Casares and Mann, 2000; Soanes et al., 2001; Wu and Cohen, 2002).

<sup>1</sup>Department of Entomology, China Agricultural University, 100193 Beijing, China.

<sup>2</sup>Institute of Genetics, Johannes Gutenberg University, 55128 Mainz, Germany.

\*Authors for correspondence (pflugfel@uni-mainz.de; shenjie@cau.edu.cn)

This is an Open Access article distributed under the terms of the Creative Commons Attribution Non-Commercial Share Alike License (<http://creativecommons.org/licenses/by-nc-sa/3.0>), which permits unrestricted non-commercial use, distribution and reproduction in any medium provided that the original work is properly cited and all further distributions of the work or adaptation are subject to the same Creative Commons License terms.

Specified cell populations (notum, hinge and blade) are separated by epithelial folds, which are initiated by the apical shortening of cells at the early to mid-L3 stage (illustrated in Fig. 1A). The morphology of the wing disc epithelium is developmentally regulated. During larval development, main disc cells undergo an elongation process caused by restructuring of the cytoskeleton (Widmann and Dahmann, 2009a). At the onset of metamorphosis, main disc cells shorten again and stretch. This, in combination with cell rearrangement and cell division leads to the evaginated form of the pupal wing disc (Fristrom and Fristrom, 1993; Taylor and Adler, 2008).

Here, we found that the distal *Doc* expression domains in the wing imaginal disc are restricted by two inhibitors, *Vg* and *Hth*, and thus are set up as two narrow stripes along the *Vg/Hth* borders, where two folds form to separate proximal blade from distal hinge [dorsal and ventral blade/hinge (B/H) folds]. *Doc* is required for B/H fold progression during the third larval instar (L3) and promotes the subsequent wing disc bending during the early pupal stage. *Doc* causes changes in cell shape with reorganization of the microtubule web and affects the abundance of integrins and extracellular matrix (ECM) components. *Mmp2* expression correlates with wild-type wing fold formation and is required for *Doc*-promoted precocious wing disc bending.

## MATERIALS AND METHODS

### *Drosophila* stocks

The mutant allele eliminating all three *Doc* genes was *Df(3L)DocA* (Reim et al., 2003). The transgenes used were as follows: *tubP-Gal80<sup>ts</sup>* (McGuire et al., 2003), *ap-Gal4* (Calleja et al., 1996), *dpp-Gal4* (Shen and Mardon, 1997), *30A-Gal4* (Brand and Perrimon, 1993), *UAS-Doc1#F2*, *UAS-Doc2#I2*, *#K3* and *#M2*, *UAS-Doc3#C2* (Reim et al., 2003), *UAS-CD8-GFP* (Lee and Luo, 1999), *UAS-Mmp2* (Page-McCaw et al., 2003), *UAS-Timp*, *UAS-MMP1RNAi*, *UAS-MMP2RNAi* (Uhlirova and Bohmann, 2006), *UAS-vg* (Kim et al., 1996), *UAS-vgRNAi* (Dietzl et al., 2007), *UAS-GFP-hth* (Casares and Mann, 1998), *UAS-hthRNAi* (Brockmann et al., 2010), *UAS-Doc1RNAi*, *UAS-Doc2RNAi* (from VDRC), *UAS-Timp* (Page-McCaw et al., 2003) and flip-in *AYGal4* (Pignoni and Zipursky, 1997). Enhancer trap lines were *hth-lacZ:hthP6* (Rieckhof et al., 1997) and *vgQE-lacZ* (Kim et al., 1996) and the protein trap GFP fusion construct was *Viking-GFP* (Collagen IV; G00454, <http://flytrap.med.yale.edu>).

### Transgene expression and clone generation

Larvae were raised at 25°C. For efficient expression of RNAi and UAS transgenes driven by the weaker 30A-Gal4, larvae were raised at 29°C. Larvae of genotype *UAS-Doc2/tubP-Gal80<sup>ts</sup>*; *dpp-Gal4/TM6B* were raised at 18°C and were then shifted to 29°C for the indicated duration before dissection.

Mitotic recombination was induced using the FLP/FRT system (Lee and Luo, 1999; Xu and Rubin, 1993). Larvae of the genotype *y w hs-flp/y w; FRT2A Ubi-GFP/FRT2A DocA* were subjected to heat shock for 1.5 hours at 38.8°C for the generation of *Doc* mutant clones. To generate *UAS-Doc2* clones, larvae of genotype *y hs-flp; UAS-GFP; AYGal4/UAS-Doc2* were subjected to 35.5°C for 30 minutes. For *vg* misexpression clones, we subjected larvae of genotype *y w hs-flp; UAS-GFP; AYGal4/UAS-vg* to the same heat shock treatment. To generate *UAS-hth* clones, larvae of genotype *y w hs-flp; AYGal4 /UAS-GFP-hth* (Casares and Mann, 1998) were treated as above.

### Immunohistochemistry

Dissected wing imaginal discs were fixed and stained with antibodies according to standard procedures. The primary antibodies used were: rabbit anti-*Doc1/2*, 1:1000 (Reim et al., 2003); mouse anti- $\alpha$ -Tubulin, 1:2000 (Sigma); mouse anti- $\alpha$ -Integrin, 1:200 (DSHB); mouse anti- $\beta$ -Integrin, 1:200 (DSHB); mouse anti-*Wg*, 1:200 (DSHB); mouse anti-*Mmp1*, 1:200 (DSHB); rabbit anti-*Mmp2*, 1:400 (Abcam); rabbit anti-Laminin, 1:200 (DSHB); mouse anti- $\beta$ -galactosidase, 1:2000 (Promega); mouse anti-BrdU,

1:200 (MBL); and rabbit anti-GFP, 1:2000 (MBL). Secondary antibodies used were goat anti-mouse DyLight 488, goat anti-rabbit DyLight 488, goat anti-mouse DyLight 549 and goat anti-rabbit DyLight 549, all 1:200 (Agrisera). Nuclei were stained with DAPI, 1:500 (Sigma). Actin was visualized with Rhodamine-phalloidin, 1:2000 (Sigma). BrdU incorporation was performed according to the manufacturer's specification (AppliChem). Images were collected using a Leica TCS SP2 AOBs confocal microscope.

### Wing disc cryosectioning

After secondary antibody staining, discs were refixed for 30 minutes in 4% paraformaldehyde, washed, and stored in 30% sucrose solution at 4°C overnight. Discs were oriented in Tissue-Tek (Sakura Finetek), frozen and cut into 20  $\mu$ m sections on a cryostat (YD-1900, YIDI, China).

## RESULTS

### The spatiotemporal expression pattern of *Doc* genes in the wing disc

The expression pattern of the *Doc1*, *Doc2* and *Doc3* (collectively *Doc*) genes appears indistinguishable during embryogenesis (Hamaguchi et al., 2004; Reim et al., 2003) and in the wing imaginal disc (Butler et al., 2003). In the late third larval wing disc, *Doc* is expressed in four distinct areas: two large stripes close to the B/H folds in the wing pouch; one smaller domain in the proximal dorsal hinge close to the anterior-posterior compartment boundary; and one stripe in the posterior lateral notum (Butler et al., 2003; Reim et al., 2003). When we analyzed *Doc* expression in cryo-embedded wing discs in their natural shape by performing confocal microscopy on *x-z* cryosections, we found that in late third larval discs the two *Doc* stripes were located in the dorsal and ventral B/H folds (Fig. 1D,D', arrows). In order to determine whether there was a correlation between *Doc* expression and B/H fold formation, we examined the expression pattern of *Doc* at several larval and early pupal stages by anti-*Doc* and phalloidin or DAPI staining to visualize the folds. *Doc* was not detectable at 80 hours after egg laying (AEL). The dorsal hinge-internal fold (dorsal H/H) was formed at this stage (Fig. 1B,B'). *Doc* was detectable from ~85 hours AEL. *Doc* expression appeared as two narrow stripes at the position where the B/H folds were simultaneously initiated (Fig. 1C,C', arrows). Subsequently, both *Doc* stripes extended laterally along with the B/H folds (Fig. 1D, arrows). At the end of larval development, the wing disc started to bend back on itself, the ventral B/H fold moving towards the dorsal B/H fold. Half an hour after puparium formation (APF) (Fig. 1E,E') and 2 hours APF (Fig. 1F,F'), the ventral B/H fold had progressed further towards the basal side of the dorsal compartment. Wing disc bending was completed at 4 hours APF. The two B/H folds and *Doc* stripes were now juxtaposed at their basal side (Fig. 1G,G', arrows). The process of wing bending and the cell shape changes from columnar to cuboidal were also visualized by phalloidin staining (supplementary material Fig. S1). The data show that *Doc* expression is spatiotemporally correlated with B/H fold progression. This indicates that *Doc* might play a role in fold progression in L3 and in the subsequent wing disc bending at the early pupal stage.

### *Doc* expression is confined by mutual antagonism between *Doc/Vg* and *Doc/Hth*

*Wg* signaling controls the fate of both blade and hinge via its downstream targets *vg* and *hth* (Klein et al., 1998; Klein and Arias, 1999; Liu et al., 2000). When marking the wing blade by *vg* and the hinge by *hth* expression we observed that the *Doc* expression domains bordered on the *vg* and *hth* domains (Fig. 2A-B').



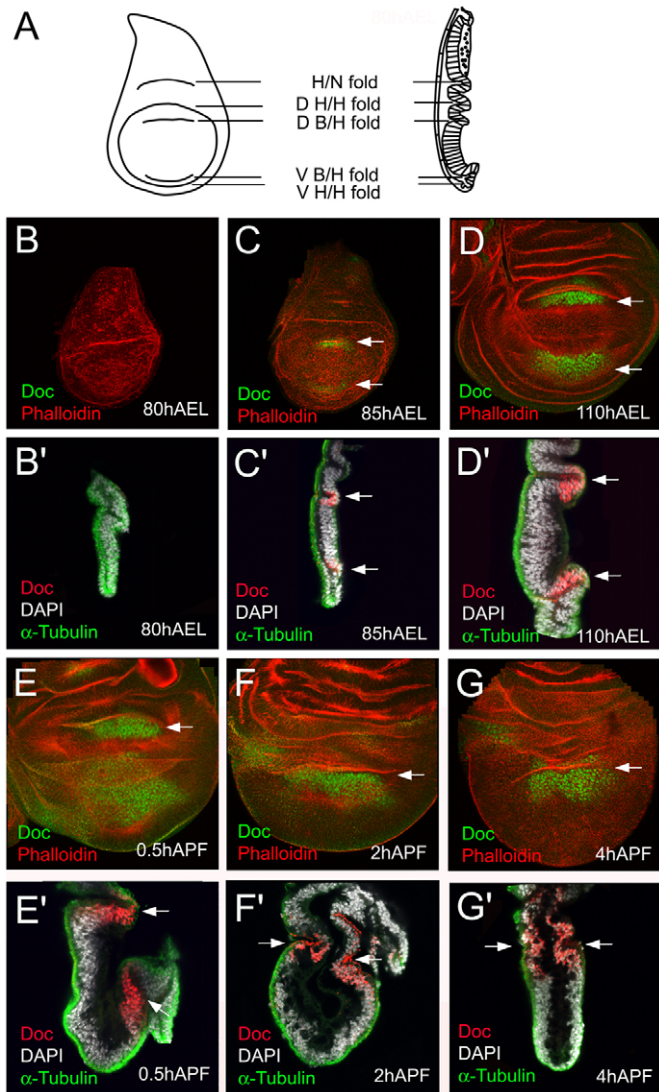

**Fig. 1. Spatiotemporal expression pattern of *Doc* in the *Drosophila* wing disc.** In this and subsequent figures, late L3 wing discs of the indicated developmental stage were imaged with a confocal microscope. *x-y* views are oriented with dorsal up and anterior left; cryosections (*x-z* views) along the anterior-posterior (AP) boundary are oriented with dorsal up and apical left. (B-G) *x-y* views, (B'-G') *x-z* views of the wing disc cryosections. Phalloidin (red), DAPI (white) and  $\alpha$ -Tubulin (green) staining were used to reveal the outline and folds of the wing disc. (A) Schematic to illustrate folds in *x-y* and *x-z* views. H/N, hinge/notum; H/H, hinge-internal; B/H, blade/hinge. (B,B') *Doc* was not detectable 80 hours after egg laying (AEL). The dorsal hinge-internal (D H/H) fold was visualized by phalloidin and DAPI staining. (C,C') *Doc* became detectable as two narrow stripes at 85 hours AEL (arrows). The dorsal blade/hinge (D B/H) fold had already formed. The ventral blade/hinge (V B/H) fold was just initiating. There was a spatiotemporal correlation between *Doc* expression and the formation of the two B/H folds. (D,D') *Doc* stripes are expanded along with a deepening of the B/H folds (arrows) at late L3 (110 hours AEL). (E,E') At the early pupal stage [0.5 hours after puparium formation (APF)], the ventral compartment bent towards the basal side of the dorsal compartment. This accounts for the apparent approach of the two *Doc* crescents seen in the *x-y* view (E). (F,F') The ventral B/H fold moved further towards the dorsal B/H fold (arrows) at 2 hours APF. In the *x-y* view the *Doc* domains appear to have fused (F). (G,G') Wing disc bending was complete at 4 hours APF. The two B/H folds and *Doc* stripes are juxtaposed at their basal sides. See supplementary material Fig. S1 for a whole-disc view of the bending process.

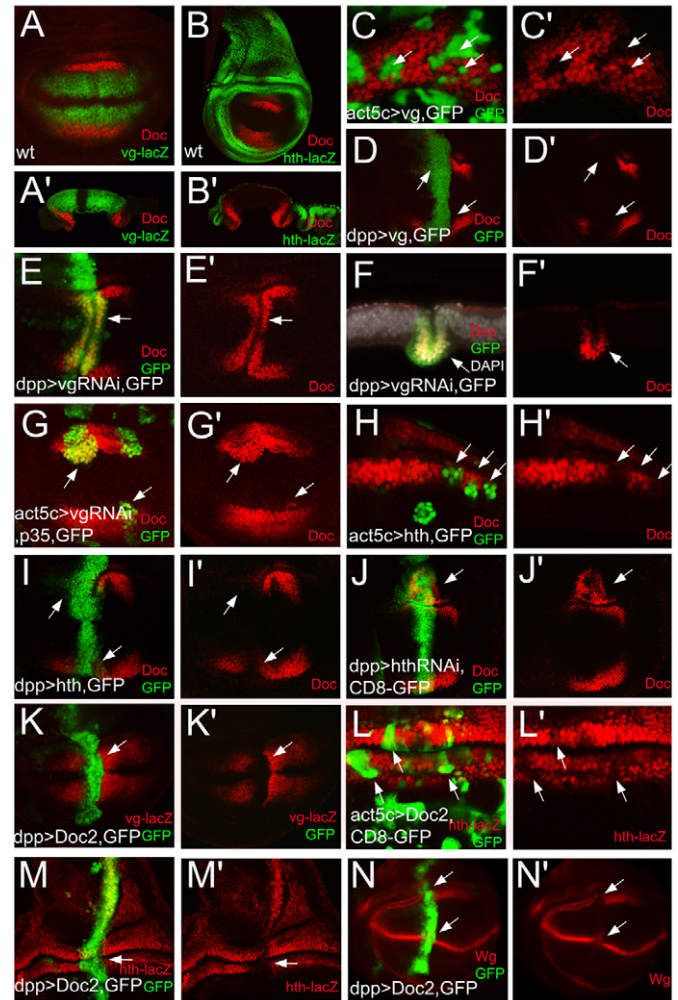

**Fig. 2. *Doc* expression is confined by mutual antagonism between *Vg/Doc* and *Hth/Doc*.** (A',B') Cryosections along the AP boundary and are oriented with dorsal right and apical up; (F',F') cryosections along the dorsal-ventral (DV) boundary and are oriented with apical up and posterior right. (A,A') *Doc* stripes ran along the dorsal and ventral borders of *vgQE-lacZ*. (B,B') *Doc* stripes bordered on the *hth-lacZ* hinge expression domain. (C,C') *Doc* was repressed in clones overexpressing *UAS-vg* (arrows). (D,D') *Doc* was repressed by *UAS-vg* in the *dpp-Gal4* domain (arrows). (E,E') *Doc* was activated in the *dpp-Gal4* domain when *vg* was repressed by *UAS-vgRNAi* (arrows). (F,F') An *x-z* cryosection of *dpp>vgRNAi* wing disc. (G,G') *Doc* was activated in clones expressing *UAS-vgRNAi*. (H,H') *Doc* was repressed in clones overexpressing *UAS-hth* (arrows). (I,I') *Doc* was repressed by *UAS-hth* in the *dpp-Gal4* domain (arrows). (J,J') *Doc* was ectopically activated in the proximal hinge region when *hth* was repressed by *dpp>hthRNAi* (arrow). (K,K') *vgQE-lacZ* was repressed by *UAS-Doc* in the *dpp-Gal4* domain (arrow). (L,L') *hth-lacZ* was downregulated in *UAS-Doc* clones (arrows). (M,M') *hth-lacZ* was repressed by *UAS-Doc* in the *dpp-Gal4* domain (arrow). (N,N') *Wg* expression was repressed both in the hinge and the blade stripe by *UAS-Doc* in the *dpp-Gal4* domain (arrows).

Therefore, we examined whether *Doc* is repressed by *Vg* and *Hth*. *Doc* was repressed in cells expressing *UAS-vg* either in clones or in the *dpp-Gal4* domain (Fig. 2C-D'). When *Vg* expression was knocked down by *UAS-vgRNAi* in clones or in the *dpp-Gal4* domain, *Doc* was derepressed (Fig. 2E-G'). These results suggest

that *Doc* is repressed by *Vg* in the wing blade region. Ectopic expression of *UAS-hth* either in clones or in the *dpp*-Gal4 domain caused cell-autonomous *Doc* repression (Fig. 2H-I'). *Hth* knockdown by expressing *UAS-hthRNAi* in the *dpp*-Gal4 domain caused *Doc* derepression in the hinge (Fig. 2J,J'). These data suggest that *hth* restricts *Doc* expression in the wing hinge region.

The repression between *Doc* and *Vg/Hth* was mutual. When overexpressing *UAS-Doc* in the *dpp*-Gal4 domain or clonally, both *vg* and *hth* were repressed (Fig. 2K-M', arrows). Since *dpp*>*UAS-Doc* inhibits both blade and hinge *wg* expression (Reim et al., 2003) (Fig. 2N,N'), repression of *vg* and *hth* by *Doc* could be caused by a decrease in *Wg* signaling. However, co-expression of *wg* and *Doc* in the *dpp*-Gal4 domain still repressed *vg* expression (supplementary material Fig. S2A,A'). Therefore, repression of *vg* by ectopic *Doc* is a direct action. Repression of *hth* by ectopic *Doc* was stronger in the distal than in the proximal hinge, but was generally less effective than the repression of *vg* (Fig. 2K-M', arrows). This might be taken to indicate that repression of *hth* by *Doc* is indirect.

In conclusion, *Doc* is restricted to two stripes adjacent to the *Vg* and *Hth* expression domains by mutual repression between *Doc* and *Vg* and between *Doc* and *Hth*. However, *Doc* loss-of-function clones did not cause ectopic expression of either *vg* or *wg* (supplementary material Fig. S2B-C'), indicating that loss of *Doc* is not sufficient for the activation of these genes.

### Doc is necessary for B/H fold progression

Because of the spatiotemporal correlation between *Doc* expression and the B/H folds, we analyzed the *Doc* requirement for fold progression. We reduced overall *Doc* activity by knockdown of two of the three *Doc* genes in the dorsal compartment (*ap*>*Doc1RNAi* + *Doc2RNAi*). The dorsal B/H fold appeared shallower than in the control (Fig. 3A-B'). Some cases also showed malformation of the hinge, which was not due to the overgrowth effect revealed by BrdU incorporation (Fig. 3B,B', arrow). The adult wings showed a held-up phenotype with severe hinge defects (supplementary material Fig. S3C,D).

In order to determine *Doc* requirement for fold progression, we generated *Doc* null mutant clones in L1 and analyzed the effect at the mid to late L3 stage. *Doc* mutant clones in a lateral position of the presumed B/H fold prevented lateral fold extension (Fig. 3C,C'). The fold in the area of the clone was shallower than in the adjacent control tissue. This was apparent by a comparison of apical (Fig. 3D) and basal (Fig. 3D') confocal sections and when discs were inspected in the *x-z* plane, the B/H fold in the *Doc* mutant clone being shallower than in the neighboring control (Fig. 3E,E'). At 2 hours APF, wing discs with *Doc* mutant clones covering the B/H fold showed a delay in bending (Fig. 3G; 83% penetrance, *n*=18) compared with the control wing disc without *Doc* mutant clones (Fig. 3F). The shape of the delayed bending wing discs was similar to that of the 0.5-hour APF wild-type disc (Fig. 1E'). The adult wings showed severe hinge defects with a held-up phenotype (supplementary material Fig. S3E,F). These results suggest that *Doc* is not required for B/H fold initiation but for their progression, i.e. for lateral extension and basal deepening at the larval stage and for normal wing disc bending progression at the early pupal stage.

In order to determine whether *Doc* is sufficient to induce fold formation and wing disc bending, we investigated the effects of *Doc* gain-of-function. When *UAS-Doc2* was ectopically expressed in the *dpp*-Gal4 domain, it induced a long and deep apical fold in the wing pouch (Fig. 3H-I'). Ectopic co-expression of the

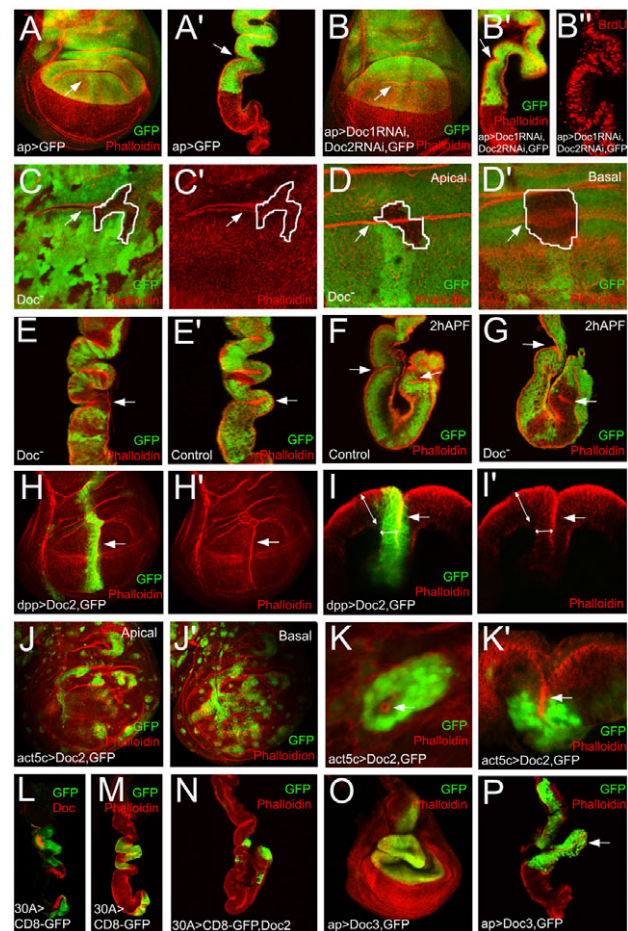

**Fig. 3. *Doc* is necessary for fold progression.** (A',B',B'',E-G,L-N,P) Cryosections along the A/P boundary of the wing disc; (I,I',K') cryosections parallel to the D/V boundary of the wing disc. (A,A') *ap*>GFP wing disc. The arrow points to the dorsal B/H fold. (B,B') The dorsal B/H fold is smaller than normal (arrow) when *Doc* was partly repressed by co-expressing *UAS-Doc1RNAi* and *UAS-Doc2RNAi* in the *ap*-Gal4 domain. (B'') Cryosection of a wing disc stained for BrdU showing uniform proliferation along the proximodistal axis. (C,C') The dorsal B/H fold (arrow) failed to extend into a lateral *Doc* mutant clone (white outline). (D) An apical section of a *Doc* mutant clone located in the central region showed normal fold formation. (D') A basal section of the same clone as in D showing the shallow base of the mutant fold. (E) Cryosection through the *Doc* mutant clone in D revealing the shallowness of the mutant fold (arrow). (E') Parallel *x-z* cryosection through the adjoining wild-type fold. (F) Cryosection of a 2-hour APF wing disc without *Doc* mutant clones. (G) Cryosection of a 2-hour APF wing disc with *Doc* mutant clone covering the B/H fold. (H,H') Overexpressing *Doc* induced a deep fold in the *dpp*-Gal4 domain (arrow). (I,I') Cryosection across the *dpp*>*Doc2*-induced fold (arrow) showing that *Doc*-overexpressing cells are significantly shorter than wild-type columnar cells (double-headed arrows). (J,J') Sections close to the apical (J) and basal (J') side of a wing disc show a predominantly basal localization of *Doc*-expressing clones (green). (K) High magnification of a *Doc*-overexpressing clone with central enrichment of F-actin (arrow). (K') Cryosection of a *Doc*-overexpressing clone showing retraction towards the basal membrane (arrow). (L,M) Cryosection of 30A>GFP late L3 wing discs. *Doc* and GFP double staining showed that the 30A-Gal4 expression domain lay proximal to the two *Doc* stripes. (N) *Doc2* overexpression in the 30A-Gal4 domain caused precocious wing disc bending already in late L3. (O,P) Overexpressing *Doc3* within the *ap*-Gal4 domain induced fusion of the dorsal hinge folds and extremely deep fold formation (arrow).



functionally redundant weaker UAS constructs of *Doc1* and *Doc3* induced similar ectopic folds (supplementary material Fig. S4). When *UAS-Doc2* was ectopically expressed in clones, these clones were localized predominantly in the basal region of the epithelium (Fig. 3J,J'). The clone center formed a ring-like structure marked by F-actin enrichment (Fig. 3K, arrow). When sectioned in an *x-z* plane, the basal retraction of central clone cells was apparent (Fig. 3K', arrow). In order to test whether Doc-induced fold formation/extrusion is due to loss of *Vg*, *Wg* or *Dpp* signaling activity in the blade region, *vg*, *wg* or *tkv<sup>OD</sup>* were co-overexpressed together with Doc. None rescued the Doc-induced phenotype (supplementary material Fig. S5). These data suggest that Doc is sufficient for fold generation.

Ectopic expression of *UAS-Doc2* in the hinge domain using the 30A-Gal4 driver, the expression domain of which lies largely outside of the B/H fold (Fig. 3L,M), caused wing discs to bend already in L3 and to reach a conformation that wild-type discs only attained 2 hours APF (Fig. 3N). Adult wings of 30A>Doc2 flies were fixed in a held-out position, showed a malformation of the proximal hinge and frequently failed to drain hemolymph after wing inflation (supplementary material Fig. S3G,H). Expression of Doc (*UAS-Doc3* or *UAS-Doc1*) in the ap-Gal4 domain caused an extreme invagination (Fig. 3O,P, arrows). The adult wings had a strongly aberrant hinge structure and failed to appose the dorsal and ventral leaflets (supplementary material Fig. S3I-L). Larvae expressing the stronger UAS construct *UAS-Doc2* in the 30A-Gal4 or ap-Gal4 domain already died at an earlier stage. These results show that Doc is required for normal hinge development and is able to promote wing disc bending at the B/H folds.

### High Doc levels induce cell shape changes along with a reorganization of the microtubule network

During larval wing disc development, the elongation of main disc cells correlates with the asymmetric distribution of microtubules to an apical position. At the late L3 stage, medial columnar cells had apically enriched microtubule arrays, whereas lateral cells, i.e. the fold cells and the cuboidal cells, had an inverted microtubule distribution. In these cells, microtubules were enriched basolaterally (Fig. 4A,A'). Loss of the apical microtubule web is a common feature of cells undergoing retraction or extrusion caused by inappropriate *Dpp* or *Wg* signaling (Gibson and Perrimon, 2005; Shen and Dahmann, 2005; Shen et al., 2008; Widmann and Dahmann, 2009a; Widmann and Dahmann, 2009b).

To explore the process of cell shape change and the cytoskeleton dynamics of Doc-induced fold formation, we used the temperature-sensitive Gal80<sup>ts</sup> system (McGuire et al., 2003) to temporally control ectopic Doc expression in the *dpp*-Gal4 domain. After 12 hours of Doc switch on, Doc-overexpressing cells expanded their apical cell diameter and showed loss of apical microtubule enrichment (Fig. 4B-C''). The basal cell diameter at this time had not yet changed (supplementary material Fig. S6A-A''). After 24 hours of Doc switch on, the microtubule web was largely redistributed to the basolateral membrane along with a shortening in cell height, which caused a shallow fold (Fig. 4D-E''), double-headed arrows) (most of the remaining apical  $\alpha$ -Tubulin staining is in the overlying peripodial epithelium). Doc-expressing cells widened their basal diameter (supplementary material Fig. S6B-B''). After 48 hours of Doc switch on, cell height was further reduced. Basal cell diameters had increased further, resulting in a deep fold with a similar microtubule distribution as in wild-type B/H folds (Fig. 4F-G''), double-headed arrows; supplementary material Fig. S6C-C''); compare with Fig. 4A').

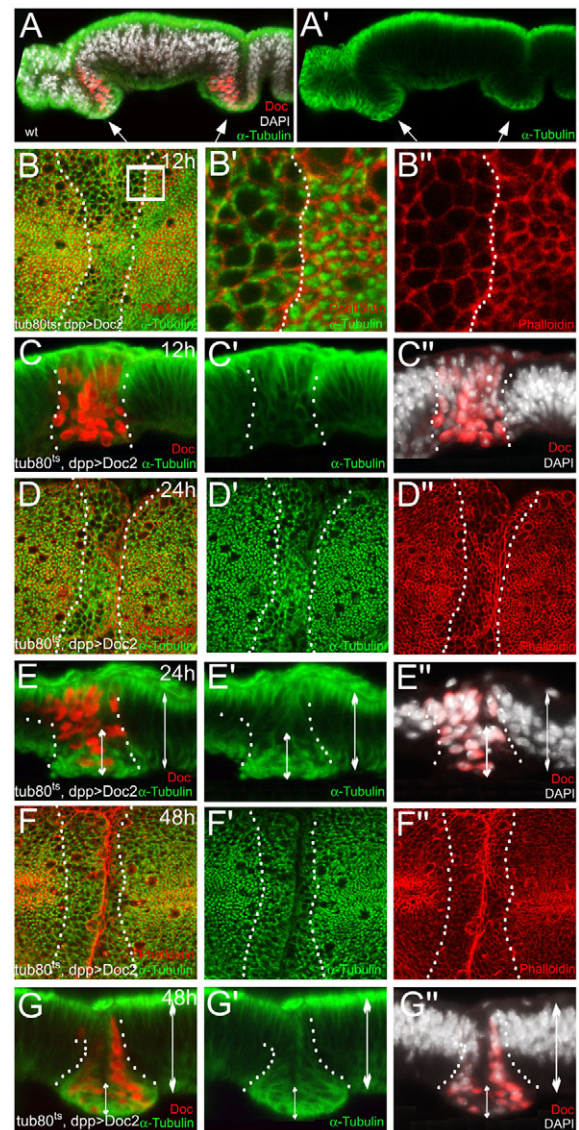

**Fig. 4. Doc induces cell shape changes with reorganization of the microtubule network.** (A,A') Cryosections along the A/P boundary of a wing disc oriented with apical up and dorsal right; (C-C'',E-E'',G-G'') cryosections along the D/V boundary of wing disc oriented with apical up and posterior right. (A,A') Wild-type B/H fold cells were shortened in cell height and showed a redistribution of the apical microtubule web towards the basolateral side (arrows). (B-G'') Conditional Doc expression in the *dpp*-Gal4 domain by *tubP*-Gal80<sup>ts</sup> control 12 (B-C''), 24 (D-E'') or 48 (F-G'') hours after temperature upshift. Dotted lines demarcate the ectopic Doc expression domain. (B-C'') Twelve hours after Doc switch on, Doc cells were apically enlarged and the central enrichment of the apical microtubule web (green) was redistributed to the cellular cortex. The boxed region in B is shown at high magnification in B'-B''. (D-E'') Twenty-four hours after Doc switch on, cells began to shorten and initiated fold formation (double-headed arrows). The microtubule web (green) was redistributed towards the basolateral side. (F-G'') Forty-eight hours after Doc switch on, cell height was significantly reduced resulting in a deep fold (double-headed arrows). The microtubule distribution now appeared similar to that in normal B/H folds (see Fig. 4A').

These data suggest that the cell shape changes along with the apicobasal redistribution of microtubules are an early event in fold formation induced by ectopic Doc. The microtubule web

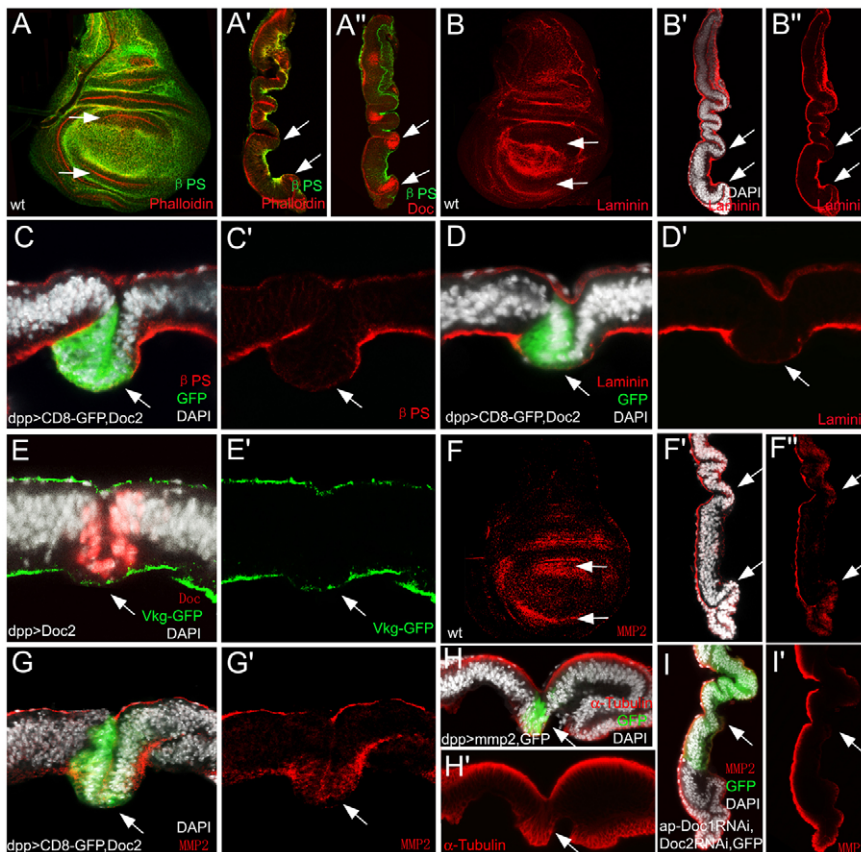

**Fig. 5. Doc-overexpressing cells degrade integrin and ECM components.** (A,B,F) x-y views of whole wing discs; (A',A'',B',B'',F',F'',I,I') cryosections along the A/P boundary oriented with dorsal up and apical left; (C-E',G-H') cryosections along the D/V boundary oriented with apical up. (A,A') The  $\beta$ -Integrin level (green) was reduced in wild-type B/H folds (arrows). (A'') Doc and integrin double staining showed that the reduction of integrin levels coincided with Doc expression. (B-B'') The Laminin level (red) was reduced in wild-type B/H folds (arrows). (C,C') The  $\beta$ -Integrin level was reduced in Doc-overexpressing cells (arrows). (D,D') The Laminin level was reduced in Doc-overexpressing cells (arrows). (E,E') The Vkg-GFP level was reduced in Doc-overexpressing cells (arrows). (F-F'') The Mmp2 level was increased in wild-type B/H folds (arrows). (G,G') Overexpressing *Doc2* in the *dpp*-Gal4 domain induced accumulation of Mmp2 (arrow), similar to the situation in wild-type B/H folds. (H,H') Overexpressing Mmp2 in the *dpp*-Gal4 domain induced fold formation and microtubule web redistribution to the basolateral side (arrow). (I,I') Repressing Doc in the *ap*-Gal4 domain reduced the Mmp2 level in the B/H fold (arrow).

redistribution might be required to generate the necessary mechanical force. Microtubules, in addition to their structural role, are required for cellular transport of organelles and proteins and for membrane trafficking (Giannakakou et al., 2000; Caviston and Holzbaaur, 2006). Our experiments do not address the mechanism by which the altered microtubule distribution affects cellular shape.

### Strong Doc expression causes precocious wing disc bending through degradation of the ECM

Cell migration within the plane of an epithelium normally requires degradation of, or detachment from, the ECM (Chen et al., 2003). Integrins are heterodimeric transmembrane receptors consisting of an  $\alpha$ -subunit non-covalently associated with a  $\beta$ -subunit. They link the ECM to the actin cytoskeleton (Gumbiner, 1996; Moser et al., 2009). Integrin-mediated cell-ECM adhesions and an intact ECM are crucial for the maintenance of columnar cell shape (Poodry and Schneiderman, 1971; Chen and Gumbiner, 2006). Disturbing integrin activity or cleaving ECM components induces cells to prematurely adopt a cuboidal morphology in the wing imaginal disc (Dominguez-Gimenez et al., 2007). Overexpression of Doc induced a similar cell shape change. Thus, an altered interaction between Doc-expressing cells and the ECM might be part of the mechanism for fold extension and deepening.

To test this possibility, we analyzed the distribution of ECM components and integrins in the wild-type B/H fold. Staining against the integrin subunits  $\alpha$ PS (which is expressed in the dorsal compartment) and  $\beta$ PS (which is ubiquitously expressed) (Brower et al., 1984) showed that integrin was depleted from the basal cell membrane of wild-type folds. In the B/H folds this coincided with

Doc expression (Fig. 5A,A'', arrows; supplementary material Fig. S7A,A'). By visualizing one of the main ECM components, Laminin (Fristrom et al., 1993), we found that the concentration of this protein was likewise reduced in the fold compared with the flanking epithelium (Fig. 5B,B'', arrows). Ectopic *Doc2* expression in the *dpp*-Gal4 domain, which induced a deep ectopic fold, caused a reduction of integrin and of the ECM components Laminin and Collagen IV (vkg-GFP) (Fessler et al., 1993; Morin et al., 2001) (Fig. 5C-E'; supplementary material Fig. S7B,B'). This suggests that remodeling or partial degradation of the ECM is involved in efficient Doc-induced fold formation.

The matrix metalloproteinases (MMPs) are highly conserved enzymes that are able to degrade the ECM (Wojtowicz-Praga et al., 1997; Coussens et al., 2002; Lynch and Matrisian, 2002; Shim et al., 2007; Page-McCaw, 2008). Their activity promotes cellular migration in two- and three-dimensional environments (Brook and Cohen, 1996; Sheetz et al., 1998; Wolf and Friedl, 2009). *Drosophila* has two MMPs: Mmp1 and Mmp2 (Page-McCaw et al., 2003). It has been reported that Mmp1 is expressed in peripodial and stalk cells and both enzymes are required for basement membrane degradation during disc eversion (Srivastava et al., 2007). We examined the expression of MMPs during fold progression. Antibody staining showed that Mmp2 is expressed in wild-type fold cells (Fig. 5F-F'') and in ectopic Doc-induced folds (Fig. 5G,G', arrows). Although Mmp1 was not detectable in wild-type fold cells, it was expressed in Doc-overexpressing cells (supplementary material Fig. S7C-D'). Upon decreasing the level of Doc in the *ap*-Gal4 domain, the Mmp2 level was downregulated in the dorsal B/H fold cells (Fig. 5I,I'). Overexpressing Mmp2 in the *dpp*-Gal4 expression domain induced fold formation along with a



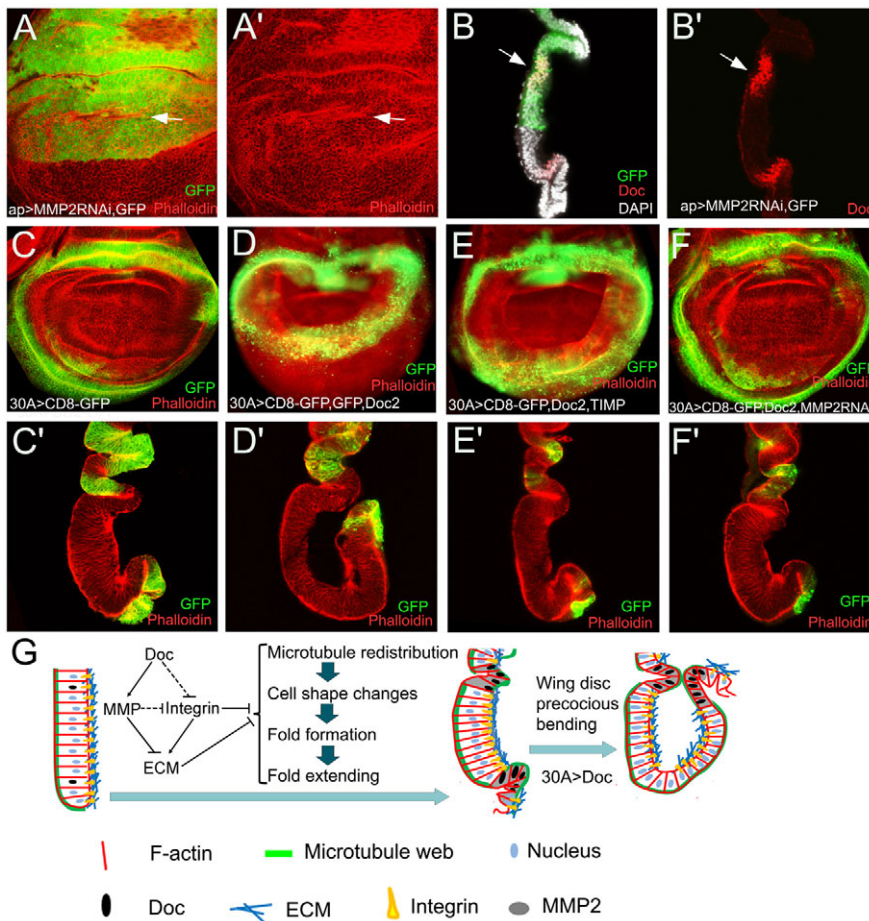

**Fig. 6. Overexpressing Doc along the B/H folds promotes wing disc bending through MMP2-dependent ECM degradation.** (B,B',C'-F') Cryosections of wing discs along the A/P boundary oriented with dorsal up and apical left. (A-B') Overexpression of *MMP2RNAi* under the control of ap-Gal4 strongly attenuated dorsal hinge fold formation (arrow). (C,C') 30A>CD8-GFP wing discs. (D,D') Overexpressing *Doc2* in the 30A-Gal4 domain promoted an early onset of wing disc bending to the pupal shape. (E,E') Co-overexpressing *Timp* with *Doc* blocked precocious wing disc bending. (F,F') This was also observed upon co-overexpression of *MMP2RNAi* with *Doc2*. (G) Model of the molecular and cellular dynamics that occur during *Doc*-promoted B/H fold progression and wing disc bending. *Doc*-expressing cells enhance MMP activity thereby loosening their contacts with the underlying ECM. Changes in integrin and ECM promote cell shape changes and fold progression, which facilitate subsequent tissue remodeling. Overexpressing *Doc* along the B/H fold by 30A>*Doc* is sufficient to induce precocious wing disc bending.

reorganization of the microtubule network (Fig. 5H,H'), mimicking the effect of overexpressing *Doc* (Fig. 4). When *MMP2RNAi* was expressed in the ap-Gal4 domain to reduce the level of *Mmp2*, the formation of the dorsal B/H fold was largely suppressed (Fig. 6A), similar to the effect of *Doc* loss-of-function (Fig. 3B and Fig. 5I). *Doc* expression was unaffected when *Mmp2* was repressed (Fig. 6B,B', arrow). Thus, *Mmp2* is downstream of *Doc* in mediating cell shape changes and proper B/H fold progression.

To determine whether enhanced MMP function contributed to the precocious wing disc bending in 30A>*Doc2* animals, we repressed MMP activity by co-overexpressing the MMP repressor *Timp* (Stetler-Stevenson et al., 1992; Godenschwege et al., 2000), together with *Doc* under 30A-Gal4 driver control. The *Doc*-dependent precocious disc bending was suppressed by *Timp* (Fig. 6E,E'). A similar rescue was achieved by *MMP2RNAi* co-expression (Fig. 6F,F'). Taken together, these data suggest that *Doc* promotes B/H fold progression and disc bending by MMP-dependent degradation of the ECM.

## DISCUSSION

Although the morphogenesis of the *Drosophila* wing disc epithelium has been studied intensively, the molecular mechanisms that tie wing disc subdivision to different fates and subsequent morphogenetic processes remain poorly understood. Here, we demonstrate that the T-box *Doc* genes take part in fold formation and promote the metamorphic development of the wing disc by controlling cell shape changes and tissue remodeling.

## The dynamic *Doc* expression pattern is regulated by mutual antagonism between *Doc/Vg* and *Doc/Hth*

To study the role of *Doc* in wing disc development, we first analyzed its spatiotemporal expression pattern by antibody staining. By simultaneous recording of *Doc* expression and fold formation, we found that there was a correlation between *Doc* expression and B/H fold formation and progression. *Doc* was not activated until the initiation of the B/H folds, which appeared later than the hinge-internal fold in early L3 (Fig. 1B,C'). During early pupal development, the ventral compartment of the wing disc folds underneath the dorsal compartment, leading to a basal apposition of the ventral and dorsal B/H folds (Fig. 1E-G'). This suggests that *Doc* plays an important role during these morphogenetic changes.

As in the embryo (Reim et al., 2003; Hamaguchi et al., 2004; Hatton-Ellis et al., 2007), *Doc* in the peripheral wing pouch is activated by *Dpp* (Szuperák et al., 2011). The formation of the double-crescent pattern requires, in addition, *Doc* repression. Previous studies established that the subdivision of the wing disc into notum, hinge and blade regions is attained by the action of *Iro-C*, *Hth/Tsh* and *Vg* in these territories, respectively (Villa-Cuesta and Modolell, 2005). The subdivision of hinge and blade cell fates requires mutual repression between *Hth* and *Vg* (Azpiazu and Morata, 2000). Our data revealed that *Doc* is expressed in the proximal region of low *vg* expression adjacent to the *hth* expression domain (Fig. 2A,B). Ectopic expression of either *vg* or *hth* was sufficient to repress *Doc* (Fig. 2C-J'). As with the mutual repression between *vg* and *hth*, there was feedback repression

between *Doc* and *vg* and between *Doc* and *hth*, ectopic *Doc* being sufficient to repress both *vg* and *hth* (Fig. 2K-M'). Therefore, the mutual antagonism between *Doc/Vg* and *Doc/Hth* defines *Doc* expression at the two B/H folds.

### Doc promotes B/H fold extension by changing cell shape in the wing disc

*Doc* was not detectable in the wing imaginal disc until the initiation of the B/H folds at ~85 hours AEL. *Doc* expression coincided in time and space with B/H fold formation (Fig. 1C-D'). Lack of *Doc* function inhibited B/H fold extension at the larval stage and caused a delay in wing disc bending at the early pupal stage (Fig. 3A-G). When *Doc* was ectopically expressed in the *dpp-Gal4* domain, it was sufficient to generate an apical fold with the same characteristics as the endogenous B/H folds (Fig. 3H-I').

To explore the mechanism of *Doc*-controlled cell shape changes and collective cell movement, we examined the distribution of cell adhesion, cytoskeletal and basal membrane proteins. The cell adhesion molecule DE-cadherin is localized at adherens junctions, which maintain the polarized architecture of epithelial cells but limit their movement. Remodeling adhesion to neighboring cells contributes to cell shape changes and cell movement (Lecuit, 2005; Pilot and Lecuit, 2005). We found no obvious effect of *Doc* overexpression on the distribution of the cell adhesion protein E-cadherin (data not shown). Similarly, the ectopic fold formed at the anterior-posterior boundary of the wing pouch when expression of the *Tbx* gene *omb* (*bifid* – FlyBase) is reduced, is not associated with an altered distribution of DE-cadherin (Shen et al., 2008). The actin and microtubule cytoskeletons coordinately control cell shape. The elongation of columnar epithelial cells requires the assembly of aligned microtubules that form a diffuse microtubule-organizing center at the apical surface (Meads and Schroer, 1995). Failure of proper microtubule organization causes columnar cells to round up and shorten along their apicobasal axis (Gibson and Perrimon, 2005; Lee et al., 2007). Both in endogenous folds and in folds triggered by ectopic *Doc* expression, the apical microtubule web was redistributed to a basolateral position, along with an expanded cell diameter and shortened cell height (Fig. 4B-G''). We propose that one mechanism by which *Doc* causes cell shape changes is by reorganizing the microtubule web.

### Mmp2-dependent ECM degradation is crucial for Doc-induced wing fold progression and disc bending

During development, morphogenesis requires the coordination of cell-cell and cell-ECM adhesions, and coordination between molecules involved in these processes is essential for tissue formation and morphogenesis (Chen and Gumbiner, 2006). The degradation of basement membrane barriers is an essential step in cancer invasion (Srivastava et al., 2007; Lukaszewicz-Zajac et al., 2011). Basement membrane modulation also plays an important role during development. A role for extracellular proteolysis in imaginal disc eversion has long been recognized (Fessler et al., 1993). Recently, it was shown that integrin-ECM interactions are necessary to maintain the columnar shape of wing disc epithelial cells (Dominguez-Gimenez et al., 2007). We have shown that overexpression of *Doc2* also causes cell shortening and widening of the cell diameter. The levels of integrin and main ECM components were downregulated in *Doc*-overexpressing cells (Fig. 5C-E') and MMP expression was ectopically activated in these cells (Fig. 5G,G'). The same changes were observed in wild-type B/H folds (Fig. 5A-B'',F,F').

Members of the MMP family are able to degrade most ECM proteins (Rowe and Weiss, 2008). Therefore, the changes in the distribution of ECM proteins and integrins might be secondary to increased MMP activity (Fig. 5G,G'). *Mmp2* is downstream of *Doc* in cell shape control, as overexpressing *Doc* was sufficient to induce *Mmp2* (Fig. 5G) and repressing *Doc* induced a reduction of *Mmp2* in B/H fold cells (Fig. 5I). Manipulation of the *Mmp2* level mimicked the effects of *Doc* on microtubule web redistribution and fold progression (Fig. 5H,H' and Fig. 6A-B'). Repression of *Mmp2* by expressing its inhibitor *Timp* or *MMP2RNAi* efficiently rescued the abnormal wing disc bending induced by 30A>*Doc* expression (Fig. 6E-F'). Taken together, *Doc*-expressing cells loosen their contacts with the underlying ECM owing to enhanced MMP activity, and changes in integrin and the ECM promote cell shape changes and facilitate subsequent tissue remodeling.

In the wing pouch bending process, cells at the dorsal-ventral boundary detach from the basal membrane, shorten and acquire a wedge-shaped morphology (Dominguez-Gimenez et al., 2007). This process is likely to contribute to the force that causes the doubling-up of the flat pouch epithelium. Our data show that *Doc* is required for proper hinge development by deepening the B/H folds of the wing disc (Fig. 3A-F; supplementary material Fig. S3C,D). *Doc* mutant clones covering the B/H fold cells lead to the delay in wing disc bending at the early pupal stage (Fig. 3G). Overexpression of *Doc* along the B/H folds elicits precocious wing pouch bending (Fig. 3N). These data indicate that the B/H folds contribute to the bending process in either a passive or active way. The deepening of the B/H folds could provide more pliability during wing disc bending.

Members of the MMP family are involved in tissue remodeling and contribute to cell migration by destroying the ECM and the basement membrane barrier (Rowe and Weiss, 2008). Elevated MMP levels cause cell shape changes and promote cell mobility by disorganizing the normal tissue architecture (Bourbouliia and Stetler-Stevenson, 2010). *Doc*-expressing B/H fold cells have increased MMP levels, causing enhanced ECM degradation. This might facilitate the concerted migration of fold cells. Ectopic *Doc* expression in the central wing pouch induced abnormal cell migration, both in the plane and out of the plane of the epithelium (data not shown). *Doc* could contribute to the wing disc bending process by promoting the movement of B/H fold cells, possibly emulating its role in amnioserosa development.

#### Acknowledgements

We thank Dr Liang for confocal microscope facilities; Ingolf Reim, Manfred Frasch, Claude Desplan, Fernando Casares, Barry Denholm, Christian Dahmann and Dirk Bohmann and the Bloomington, VDRC and Kyoto stock centers for fly stocks; Manfred Frasch for the *Doc* antibody; Developmental Studies Hybridoma Bank for antibodies; and Erika Jost for fly husbandry.

#### Funding

This research was supported by the National Natural Science Foundation of China [NSFC31071696]; New Century Excellent Talent Award Program from Ministry of Education of China [NCET090734]; and Deutsche Forschungsgemeinschaft [Pf 163/15-1]. Deposited in PMC for immediate release.

#### Competing interests statement

The authors declare no competing financial interests.

#### Supplementary material

Supplementary material available online at <http://dev.biologists.org/lookup/suppl/doi:10.1242/dev.079384/-DC1>



## References

- Azpiazu, N. and Morata, G.** (2000). Function and regulation of homothorax in the wing imaginal disc of *Drosophila*. *Development* **127**, 2685-2693.
- Bourboullia, D. and Stetler-Stevenson, W. G.** (2010). Matrix metalloproteinases (MMPs) and tissue inhibitors of metalloproteinases (TIMPs): Positive and negative regulators in tumor cell adhesion. *Semin. Cancer Biol.* **20**, 161-168.
- Brand, A. H. and Perrimon, N.** (1993). Targeted gene expression as a means of altering cell fates and generating dominant phenotypes. *Development* **118**, 401-415.
- Brockmann, A., Dominguez-Cejudo, M. A., Amore, G. and Casares, F.** (2010). Regulation of ocellar specification and size by twin of eyeless and homothorax. *Dev. Dyn.* **240**, 75-85.
- Brook, W. J. and Cohen, S. M.** (1996). Antagonistic interactions between wingless and decapentaplegic responsible for dorsal-ventral pattern in the *Drosophila* leg. *Science* **273**, 1373-1377.
- Brower, D. L., Wilcox, M., Piovant, M., Smith, R. J. and Reger, L. A.** (1984). Related cell-surface antigens expressed with positional specificity in *Drosophila* imaginal discs. *Proc. Natl. Acad. Sci. USA* **81**, 7485-7489.
- Bryant, P. J.** (1970). Cell lineage relationships in the imaginal wing disc of *Drosophila melanogaster*. *Dev. Biol.* **22**, 389-411.
- Butler, M. J., Jacobsen, T. L., Cain, D. M., Jarman, M. G., Hubank, M., Whittle, J. R., Phillips, R. and Simcox, A.** (2003). Discovery of genes with highly restricted expression patterns in the *Drosophila* wing disc using DNA oligonucleotide microarrays. *Development* **130**, 659-670.
- Calleja, M., Moreno, E., Pelaz, S. and Morata, G.** (1996). Visualization of gene expression in living adult *Drosophila*. *Science* **274**, 252-255.
- Casares, F. and Mann, R. S.** (1998). Control of antennal versus leg development in *Drosophila*. *Nature* **392**, 723-726.
- Casares, F. and Mann, R. S.** (2000). A dual role for homothorax in inhibiting wing blade development and specifying proximal wing identities in *Drosophila*. *Development* **127**, 1499-1508.
- Caviston, J. P. and Holzbaur, E. L.** (2006). Microtubule motors at the intersection of trafficking and transport. *Trends Cell Biol.* **16**, 530-537.
- Chen, C. S., Alonso, J. L., Ostuni, E., Whitesides, G. M. and Ingber, D. E.** (2003). Cell shape provides global control of focal adhesion assembly. *Biochem. Biophys. Res. Commun.* **307**, 355-361.
- Chen, X. and Gumbiner, B. M.** (2006). Crosstalk between different adhesion molecules. *Curr. Opin. Cell Biol.* **18**, 572-578.
- Cohen, S. M.** (1993). Imaginal disc development. In *The Development of Drosophila melanogaster* (ed. M. Bate and A. Martinez Arias), pp. 747-841. New York: Cold Spring Harbor Laboratory Press.
- Coussens, L. M., Fingleton, B. and Matrisian, L. M.** (2002). Matrix metalloproteinase inhibitors and cancer: trials and tribulations. *Science* **295**, 2387-2392.
- Dietzl, G., Chen, D., Schnorrer, F., Su, K. C., Barinova, Y., Fellner, M., Gasser, B., Kinsey, K., Oettel, S., Scheiblauer, S. et al.** (2007). A genome-wide transgenic RNAi library for conditional gene inactivation in *Drosophila*. *Nature* **448**, 151-156.
- Diez del Corral, R., Aroca, P., Gómez-Skarmeta, J. L., Cavodeassi, F. and Modolell, J.** (1999). The Iroquois homeodomain proteins are required to specify body wall identity in *Drosophila*. *Genes Dev.* **13**, 1754-1761.
- Dominguez-Gimenez, P., Brown, N. H. and Martin-Bermudo, M. D.** (2007). Integrin-ECM interactions regulate the changes in cell shape driving the morphogenesis of the *Drosophila* wing epithelium. *J. Cell Sci.* **120**, 1061-1071.
- Fessler, L. I., Condic, M. L., Nelson, R. E., Fessler, J. H. and Fristrom, J. W.** (1993). Site-specific cleavage of basement membrane collagen IV during *Drosophila* metamorphosis. *Development* **117**, 1061-1069.
- Fristrom, D., Wilcox, M. and Fristrom, J.** (1993). The distribution of PS integrins, laminin A and F-actin during key stages in *Drosophila* wing development. *Development* **117**, 509-523.
- Fristrom, D. K. and Fristrom, J. W.** (1993). The metamorphic development of the adult epidermis. In *The Development of Drosophila melanogaster* (ed. C. Bate and A. Martinez Arias), pp. 843-897. New York: Cold Spring Harbor Laboratory Press.
- Giannakakou, P., Sackett, D. L., Ward, Y., Webster, K. R., Blagosklonny, M. V. and Fojo, T.** (2000). p53 is associated with cellular microtubules and is transported to the nucleus by dynein. *Nat. Cell Biol.* **2**, 709-717.
- Gibson, M. C. and Perrimon, N.** (2005). Extrusion and death of DPP/BMP-compromised epithelial cells in the developing *Drosophila* wing. *Science* **307**, 1785-1789.
- Godenschwege, T. A., Pohar, N., Buchner, S. and Buchner, E.** (2000). Inflated wings, tissue autolysis and early death in tissue inhibitor of metalloproteinases mutants of *Drosophila*. *Eur. J. Cell Biol.* **79**, 495-501.
- Grieder, N. C., Morata, G., Affolter, M. and Gehring, W. J.** (2009). Spalt major controls the development of the notum and of wing hinge primordia of the *Drosophila melanogaster* wing imaginal disc. *Dev. Biol.* **329**, 315-326.
- Gumbiner, B. M.** (1996). Cell adhesion: the molecular basis of tissue architecture and morphogenesis. *Cell* **84**, 345-357.
- Hamaguchi, T., Yabe, S., Uchiyama, H. and Murakami, R.** (2004). *Drosophila* Tbx6-related gene, Dorsocross, mediates high levels of Dpp and Scw signal required for the development of amnioserosa and wing disc primordium. *Dev. Biol.* **265**, 355-368.
- Hatton-Ellis, E., Ainsworth, C., Sushama, Y., Wan, S., VijayRaghavan, K. and Skaer, H.** (2007). Genetic regulation of patterned tubular branching in *Drosophila*. *Proc. Natl. Acad. Sci. USA* **104**, 169-174.
- Ingham, P. W. and Placzek, M.** (2006). Orchestrating ontogenesis: variations on a theme by sonic hedgehog. *Nat. Rev. Genet.* **7**, 841-850.
- Kim, J., Sebring, A., Esch, J. J., Kraus, M. E., Vorwerk, K., Magee, J. and Carroll, S. B.** (1996). Integration of positional signals and regulation of wing formation and identity by *Drosophila* vestigial gene. *Nature* **382**, 133-138.
- King, M., Arnold, J. S., Shanske, A. and Morrow, B. E.** (2006). T-genes and limb bud development. *Am. J. Med. Genet. A* **140**, 1407-1413.
- Klein, T.** (2001). Wing disc development in the fly: the early stages. *Curr. Opin. Genet. Dev.* **11**, 470-475.
- Klein, T. and Arias, A. M.** (1999). The vestigial gene product provides a molecular context for the interpretation of signals during the development of the wing in *Drosophila*. *Development* **126**, 913-925.
- Klein, T., Couso, J. P. and Martinez Arias, A.** (1998). Wing development and specification of dorsal cell fates in the absence of apterous in *Drosophila*. *Curr. Biol.* **8**, 417-420.
- Lecuit, T.** (2005). Adhesion remodeling underlying tissue morphogenesis. *Trends Cell Biol.* **15**, 34-42.
- Lee, C., Scherr, H. M. and Wallingford, J. B.** (2007). Shroom family proteins regulate gamma-tubulin distribution and microtubule architecture during epithelial cell shape change. *Development* **134**, 1431-1441.
- Lee, T. and Luo, L.** (1999). Mosaic analysis with a repressible cell marker for studies of gene function in neuronal morphogenesis. *Neuron* **22**, 451-461.
- Liu, X., Grammont, M. and Irvine, K. D.** (2000). Roles for scalloped and vestigial in regulating cell affinity and interactions between the wing blade and the wing hinge. *Dev. Biol.* **228**, 287-303.
- Lo, P. C. and Frasch, M.** (2001). A role for the COUP-TF-related gene seven-up in the diversification of cardioblast identities in the dorsal vessel of *Drosophila*. *Mech. Dev.* **104**, 49-60.
- Lukaszewicz-Zajac, M., Mroczko, B. and Szmittkowski, M.** (2011). Gastric cancer – the role of matrix metalloproteinases in tumor progression. *Clin. Chim. Acta* **412**, 1725-1730.
- Lynch, C. C. and Matrisian, L. M.** (2002). Matrix metalloproteinases in tumor-host cell communication. *Differentiation* **70**, 561-573.
- McGuire, S. E., Le, P. T., Osborn, A. J., Matsumoto, K. and Davis, R. L.** (2003). Spatiotemporal rescue of memory dysfunction in *Drosophila*. *Science* **302**, 1765-1768.
- Meads, T. and Schroer, T. A.** (1995). Polarity and nucleation of microtubules in polarized epithelial cells. *Cell Motil. Cytoskeleton* **32**, 273-288.
- Morata, G. and Lawrence, P. A.** (1977). The development of wingless, a homeotic mutation of *Drosophila*. *Dev. Biol.* **56**, 227-240.
- Morin, X., Daneman, R., Zavortink, M. and Chia, W.** (2001). A protein trap strategy to detect GFP-tagged proteins expressed from their endogenous loci in *Drosophila*. *Proc. Natl. Acad. Sci. USA* **98**, 15050-15055.
- Moser, M., Legate, K. R., Zent, R. and Fassler, R.** (2009). The tail of integrins, talin, and kindlins. *Science* **324**, 895-899.
- Murakami, R., Shigenaga, A., Kawakita, M., Takimoto, K., Yamaoka, I., Akasaka, K. and Shimada, H.** (1995). aptroctous, a locus that is necessary for the development of the proctodeum in *Drosophila* embryos, encodes a homolog of the vertebrate Brachyury gene. *Dev. Genes Evol.* **205**, 89-96.
- Neumann, C. J. and Cohen, S. M.** (1996). Distinct mitogenic and cell fate specification functions of wingless in different regions of the wing. *Development* **122**, 1781-1789.
- Page-McCaw, A.** (2008). Remodeling the model organism: matrix metalloproteinase functions in invertebrates. *Semin. Cell Dev. Biol.* **19**, 14-23.
- Page-McCaw, A., Serano, J., Sante, J. M. and Rubin, G. M.** (2003). *Drosophila* matrix metalloproteinases are required for tissue remodeling, but not embryonic development. *Dev. Cell* **4**, 95-106.
- Pflugfelder, G. O., Roth, H., Poeck, B., Kerscher, S., Schwarz, H., Jonschker, B. and Heisenberg, M.** (1992). The lethal(1)optomotor-blind gene of *Drosophila melanogaster* is a major organizer of optic lobe development: isolation and characterization of the gene. *Proc. Natl. Acad. Sci. USA* **89**, 1199-1203.
- Pignoni, F. and Zipursky, S. L.** (1997). Induction of *Drosophila* eye development by decapentaplegic. *Development* **124**, 271-278.
- Pilot, F. and Lecuit, T.** (2005). Compartmentalized morphogenesis in epithelia: from cell to tissue shape. *Dev. Dyn.* **232**, 685-694.
- Poodry, C. A. and Schneiderman, H. A.** (1971). Intercellular adhesivity and pupal morphogenesis in *Drosophila melanogaster*. *Dev. Genes Evol.* **168**, 1-9.
- Porsch, M., Hofmeyer, K., Bausenwein, B. S., Grimm, S., Weber, B. H., Miassod, R. and Pflugfelder, G. O.** (1998). Isolation of a *Drosophila* T-box gene closely related to human TBX1. *Gene* **212**, 237-248.
- Reim, I. and Frasch, M.** (2005). The Dorsocross T-box genes are key components of the regulatory network controlling early cardiogenesis in *Drosophila*. *Development* **132**, 4911-4925.

- Reim, I., Lee, H. H. and Frasch, M. (2003). The T-box-encoding Dorsocross genes function in amnioserosa development and the patterning of the dorsolateral germ band downstream of Dpp. *Development* **130**, 3187-3204.
- Rieckhof, G. E., Casares, F., Ryoo, H. D., Abu-Shaar, M. and Mann, R. S. (1997). Nuclear translocation of extradenticle requires homothorax, which encodes an extradenticle-related homeodomain protein. *Cell* **91**, 171-183.
- Rowe, R. G. and Weiss, S. J. (2008). Breaching the basement membrane: who, when and how? *Trends Cell Biol.* **18**, 560-574.
- Sharma, R. P. and Chopra, V. L. (1976). Effect of the Wingless (wg1) mutation on wing and haltere development in *Drosophila melanogaster*. *Dev. Biol.* **48**, 461-465.
- Sheetz, M. P., Felsenfeld, D. P. and Galbraith, C. G. (1998). Cell migration: regulation of force on extracellular-matrix-integrin complexes. *Trends Cell Biol.* **8**, 51-54.
- Shen, J. and Dahmann, C. (2005). Extrusion of cells with inappropriate Dpp signaling from *Drosophila* wing disc epithelia. *Science* **307**, 1789-1790.
- Shen, J., Dörner, C., Bahlo, A. and Pflugfelder, G. O. (2008). optomotor-blind suppresses instability at the A/P compartment boundary of the *Drosophila* wing. *Mech. Dev.* **125**, 233-246.
- Shen, W. and Mardon, G. (1997). Ectopic eye development in *Drosophila* induced by directed dachshund expression. *Development* **124**, 45-52.
- Shim, K. N., Jung, S. A., Joo, Y. H. and Yoo, K. (2007). Clinical significance of tissue levels of matrix metalloproteinases and tissue inhibitors of metalloproteinases in gastric cancer. *J. Gastroenterol.* **42**, 120-128.
- Singer, J. B., Harbecke, R., Kusch, T., Reuter, R. and Lengyel, J. A. (1996). *Drosophila* brachyenteron regulates gene activity and morphogenesis in the gut. *Development* **122**, 3707-3718.
- Soanes, K. H., MacKay, J. O., Core, N., Heslip, T., Kerridge, S. and Bell, J. B. (2001). Identification of a regulatory allele of *teashirt* (*tsh*) in *Drosophila melanogaster* that affects wing hinge development. An adult-specific *tsh* enhancer in *Drosophila*. *Mech. Dev.* **105**, 145-151.
- Srivastava, A., Pastor-Pareja, J. C., Igaki, T., Pagliarini, R. and Xu, T. (2007). Basement membrane remodeling is essential for *Drosophila* disc eversion and tumor invasion. *Proc. Natl. Acad. Sci. USA* **104**, 2721-2726.
- Stetler-Stevenson, W. G., Bersch, N. and Golde, D. W. (1992). Tissue inhibitor of metalloproteinase-2 (TIMP-2) has erythroid-potentiating activity. *FEBS Lett.* **296**, 231-234.
- Szuperák, M., Salah, S., Meyer, E. J., Nagarajan, U., Ikmi, A. and Gibson, M. C. (2011). Feedback regulation of *Drosophila* BMP signaling by the novel extracellular protein larval translucida. *Development* **138**, 715-724.
- Taylor, J. and Adler, P. N. (2008). Cell rearrangement and cell division during the tissue level morphogenesis of evaginating *Drosophila* imaginal discs. *Dev. Biol.* **313**, 739-751.
- Uhlirva, M. and Bohmann, D. (2006). JNK- and Fos-regulated Mmp1 expression cooperates with Ras to induce invasive tumors in *Drosophila*. *EMBO J.* **25**, 5294-5304.
- Villa-Cuesta, E. and Modolell, J. (2005). Mutual repression between *msh* and *Iro-C* is an essential component of the boundary between body wall and wing in *Drosophila*. *Development* **132**, 4087-4096.
- Widmann, T. J. and Dahmann, C. (2009a). Dpp signaling promotes the cuboidal-to-columnar shape transition of *Drosophila* wing disc epithelia by regulating Rho1. *J. Cell Sci.* **122**, 1362-1373.
- Widmann, T. J. and Dahmann, C. (2009b). Wingless signaling and the control of cell shape in *Drosophila* wing imaginal discs. *Dev. Biol.* **334**, 161-173.
- Wojtowicz-Praga, S. M., Dickson, R. B. and Hawkins, M. J. (1997). Matrix metalloproteinase inhibitors. *Invest. New Drugs* **15**, 61-75.
- Wolf, K. and Friedl, P. (2009). Mapping proteolytic cancer cell-extracellular matrix interfaces. *Clin. Exp. Metastasis* **26**, 289-298.
- Wu, J. and Cohen, S. M. (2002). Repression of *Teashirt* marks the initiation of wing development. *Development* **129**, 2411-2418.
- Xu, T. and Rubin, G. M. (1993). Analysis of genetic mosaics in developing and adult *Drosophila* tissues. *Development* **117**, 1223-1237.
